# Supplementary material
Source: Springer Nature journal article supplement (https://www.springermedizin.de/resource/supplementary/12957_2013_1408_MOESM9_ESM.pdf/9562532)

Left

Cervix

Left ligamentous mesometrium  
lateral (sacrouterine) part

A. and V. iliaca externa

Ureter

Mesoreter

Plexus hypogastricus inferior Rectum

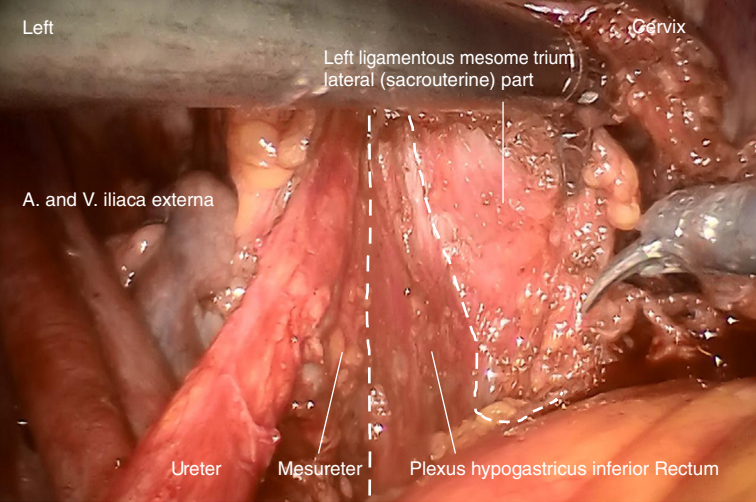

Supplement: MOESM9 [file 9562532]
